# Supplementary material for: The Influence of the Posterior Slope Angle and Posterior Condylar Offset in Posterior-Stabilized Total Knee Arthroplasty Was Analyzed From the Way of Constructing Flexion Gap
Source: Research Square preprint supplement (doi:10.21203/rs.3.rs-482088/v1), 2021-05-12
Supplement: Supplementary file 1 [file 91ba5525d78be390ba0fbbd2.xlsx]

## Sheet: Sheet1
group	id	gender	age	bmi	postpsa	postpso	pepsa	pepso	pef	pof	extend	group	id	gender	age	bmi	postpsa	postpso	pepsa	pepso	pef	pof	extend
1	1	0	79	30.56	12.17	40.86	3.14	39.24	60	110	2
0	2	0	79	30.56	2.77	39.86	3.39	40.17	100	110	0
1	31	0	59	21.36	7.71	26.3	3.6	24.52	96	130	0
0	4	0	58	23.43	8.54	30.63	10.22	34.13	120	98	1
1	36	0	62	25.31	7.34	29.31	3.15	27.48	103	126	0
0	5	0	58	24.34	5.34	26.37	8.04	28.86	90	115	0
1	13	1	76	24.33	6.78	36.72	2.64	35.26	86	127	1
0	7	1	69	26.46	6.63	38.5	12.98	41.07	90	110	0
1	34	0	54	23.95	12.87	33.44	11.07	32.33	105	117	0
0	8	0	53	23.45	7.02	20.13	8.12	22.49	100	115	0
1	11	0	72	20.76	7.05	30.23	5.59	26.37	90	85	0
0	9	0	61	26.31	2.96	26.14	5.34	27.79	90	126	0
1	32	0	61	29.72	9.99	31.56	3.01	28.5	105	123	1
0	10	0	65	27.68	4.96	31.07	12.51	32.59	60	130	0
1	23	0	62	22.73	6.75	29.71	6.56	27.59	106	110	0
0	16	0	61	21.12	4.92	34.7	7.38	35.75	93	130	0
1	33	0	78	25.13	9.31	32.41	3.45	30.26	60	115	1
0	18	1	67	23.78	8.24	34.03	9.56	36.26	60	98	0
1	21	0	69	25.74	8.39	33.47	6.63	29.73	90	102	0
0	20	0	64	26.45	2.54	32.02	11.25	36.72	84	100	0
1	14	0	68	30.04	13.12	33.62	9.58	32.21	30	132	1
0	24	0	84	23.33	4.14	36.55	4.96	38.16	120	105	0
1	29	1	64	21.45	9.89	28.45	3.89	27.64	75	135	2
0	27	0	68	24.73	5.19	34.2	6.61	37.64	105	115	2
1	26	1	64	23.46	13.26	34	3.77	31.18	50	110	2
0	28	1	68	24.16	4.51	30.37	5.55	30.65	95	110	0
1	15	0	68	23.65	9.85	39.65	6.13	35.12	86	95	3
0	30	0	62	23.71	3.35	28.95	7.84	30.87	80	110	0
